# Supplementary material for: A general strategy for preparing pyrrolic-N4 type single-atom catalysts via pre-located isolated atoms
Source: PubMed Central journal article supplement (PMC8611002; doi:10.1038/s41467-021-27143-5), 2021-11-23
Supplement: 41467_2021_27143_MOESM1_ESM.pdf [file 41467_2021_27143_MOESM1_ESM.pdf]

# A General Strategy for Preparing Pyrrolic-N<sub>4</sub> Type Single-Atom

## Catalysts via Pre-located Isolated Atoms

Junjie Li<sup>1, †</sup>, Ya-fei Jiang<sup>2, †</sup>, Qi Wang<sup>3, †</sup>, Cong-Qiao Xu<sup>2</sup>, Duojie Wu<sup>3</sup>, Mohammad Norouzi Banis<sup>1</sup>, Keegan R. Adair<sup>1</sup>, Kieran Doyle-Davis<sup>1</sup>, Debora Motta Meira<sup>4, 5</sup>, Y. Zou Finfrock<sup>4, 5</sup>, Weihan Li<sup>1</sup>, Lei Zhang<sup>1</sup>, Tsun-Kong Sham<sup>6</sup>, Ruying Li<sup>1</sup>, Ning Chen<sup>4, \*</sup>, Meng Gu<sup>3, \*</sup>, Jun Li<sup>2, 7, \*</sup>, Xueliang Sun<sup>1, \*</sup>

<sup>1</sup>Department of Mechanical and Materials Engineering, University of Western Ontario, London, ON N6A 5B9, Canada.

<sup>2</sup>Department of Chemistry, Southern University of Science and Technology, Shenzhen 518055, China

<sup>3</sup>Department of Materials Science and Engineering, Southern University of Science and Technology, Shenzhen 518055, China

<sup>4</sup>Science Division, Canadian Light Source Inc., 44 Innovation Boulevard, Saskatoon, SK S7N 2V3, Canada.

<sup>5</sup>CLS @ APS, Advanced Photon Source, Argonne National Laboratory, Lemont, IL 60439, USA

<sup>6</sup>Department of Chemistry, University of Western Ontario, London, Ontario, Canada N6A 5B7, Canada

<sup>7</sup>Department of Chemistry and Key Laboratory of Organic Optoelectronics and Molecular Engineering of Ministry of Education, Tsinghua University, Beijing 100084, China.

Corresponding Email: [ning.chen@lightsource.ca](mailto:ning.chen@lightsource.ca); [gum@sustech.edu.cn](mailto:gum@sustech.edu.cn); [junli@tsinghua.edu.cn](mailto:junli@tsinghua.edu.cn); [xsun9@uwo.ca](mailto:xsun9@uwo.ca)

<sup>†</sup>These authors contributed equally to this work

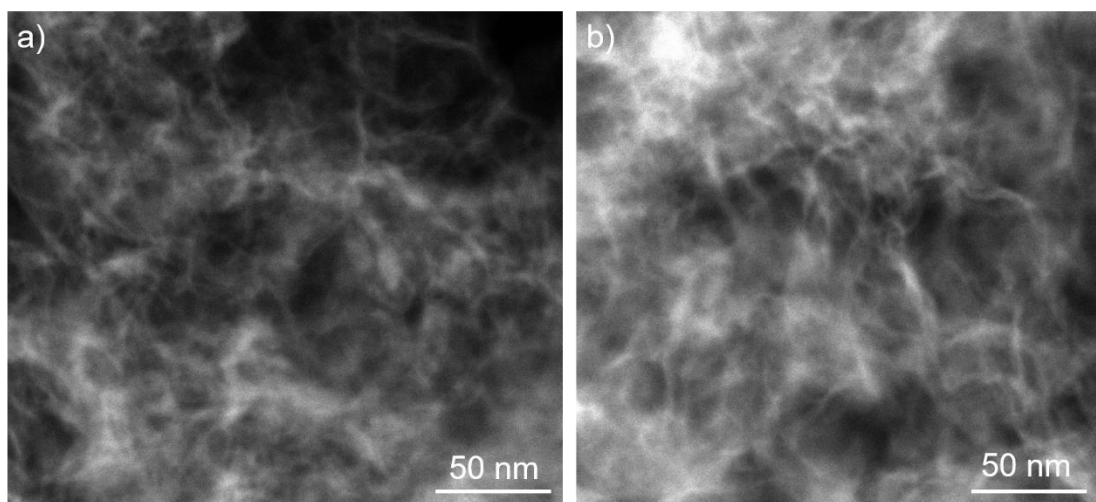

**Supplementary Fig. 1** HAADF-STEM images of NCNS at different locations (a and b).

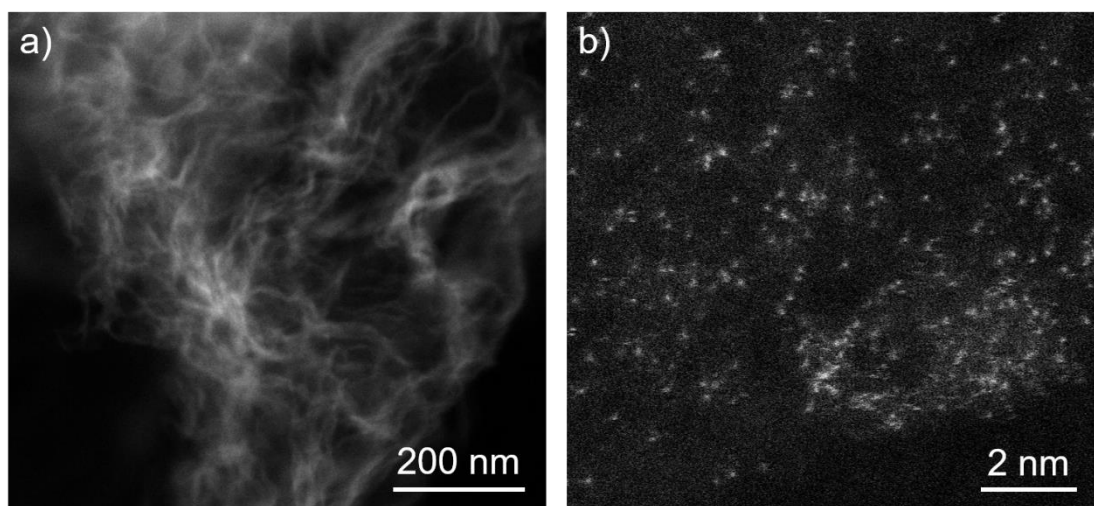

**Supplementary Fig. 2** HAADF-STEM images of Pt<sub>1</sub>/NCNS at low (a) and high (b) magnification.

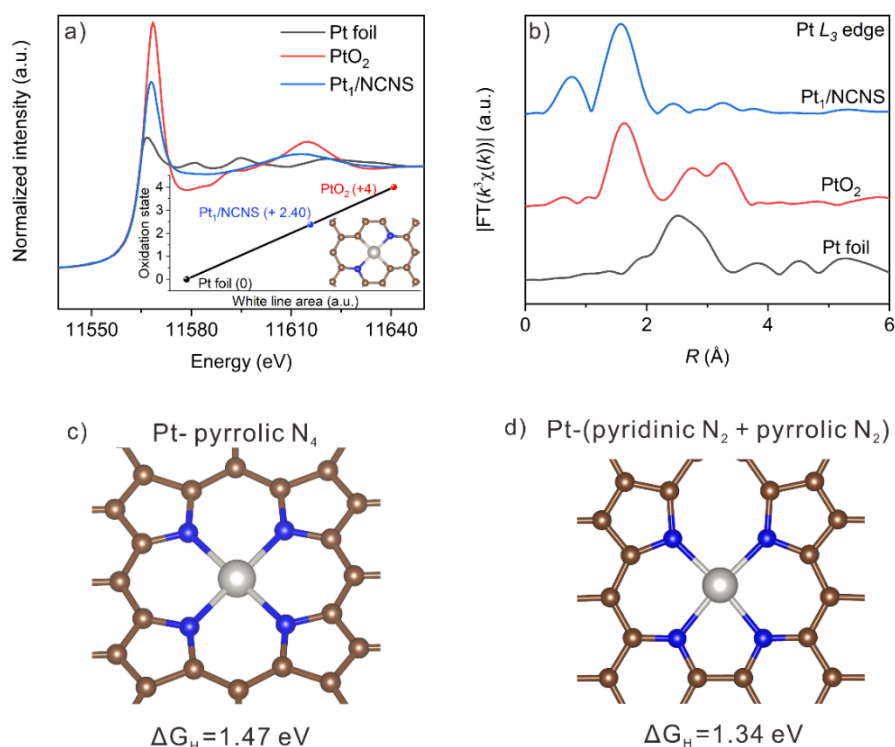

**Supplementary Fig. 3** (a) XANES and (b) EXAFS of Pt<sub>1</sub>/NCNS, as well as Pt foil and PtO<sub>2</sub> reference at Pt *L*<sub>3</sub> edge. Inset: averaged oxidation state of Pt on Pt<sub>1</sub>/NCNS based on the white line area. (c and d) DFT optimized possible structures and calculated Gibbs free energy profiles of HER at the equilibrium potential of Pt SAC at T = 298.15 K and P = 1 atm.

**Note:**

The Pt *L*<sub>3</sub> edge XANES result of Pt<sub>1</sub>/NCNS is distinct from the Pt foil, it shows a very intense high white line (WL) at higher photon energy compared to that of Pt foil, indicating Pt is at a high oxidization state with a significant increase in 5*d* hole counts compared to Pt metal (**Supplementary Fig. 3a**). It is established that the area under the WL curve is proportional to the total unoccupied state of Pt 5*d* orbitals which also can reflect the oxidation state of Pt<sub>1</sub> atoms<sup>1</sup>. After quantitative analysis of the WL area, we found that the average oxidation state of Pt<sub>1</sub> atom is around +2.4, indicating the Pt could bond with two N atoms (**Supplementary Fig. 3a**)<sup>2</sup>.

We have built two possible structures of Pt SACs with pyrrole N sites, as shown in **Supplementary Figs. 3c and d**. However, both of them show high Gibbs free energy barrier ( $\Delta G_H$ ), indicating the poor HER activity, which differs from the HER performance of Pt<sub>1</sub>/NCNS<sup>3</sup>. Therefore, we conclude the Pt<sub>1</sub> atom prefers to coordinate pyridine N rather than pyrrole N sites.

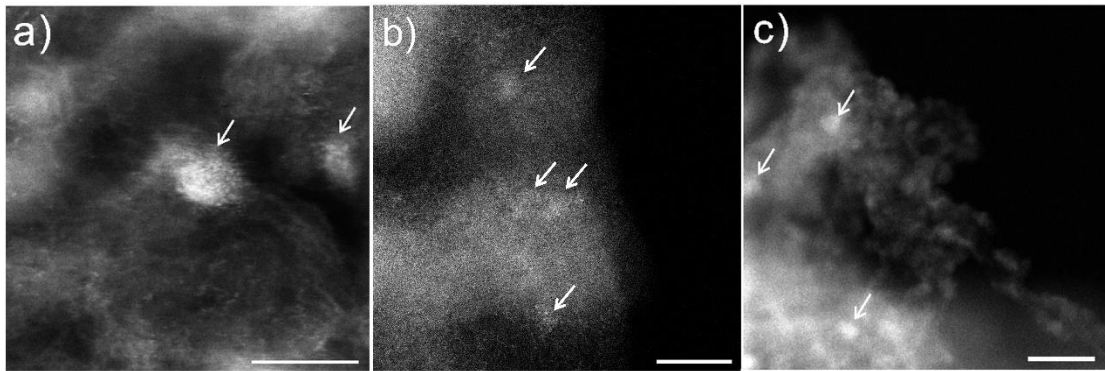

**Supplementary Fig. 4** HAADF-STEM images of Fe (a), Co (b), Ni-NPs/NCNS (c). Scale bar: 5 nm. The white arrows highlight the clusters/NPs.

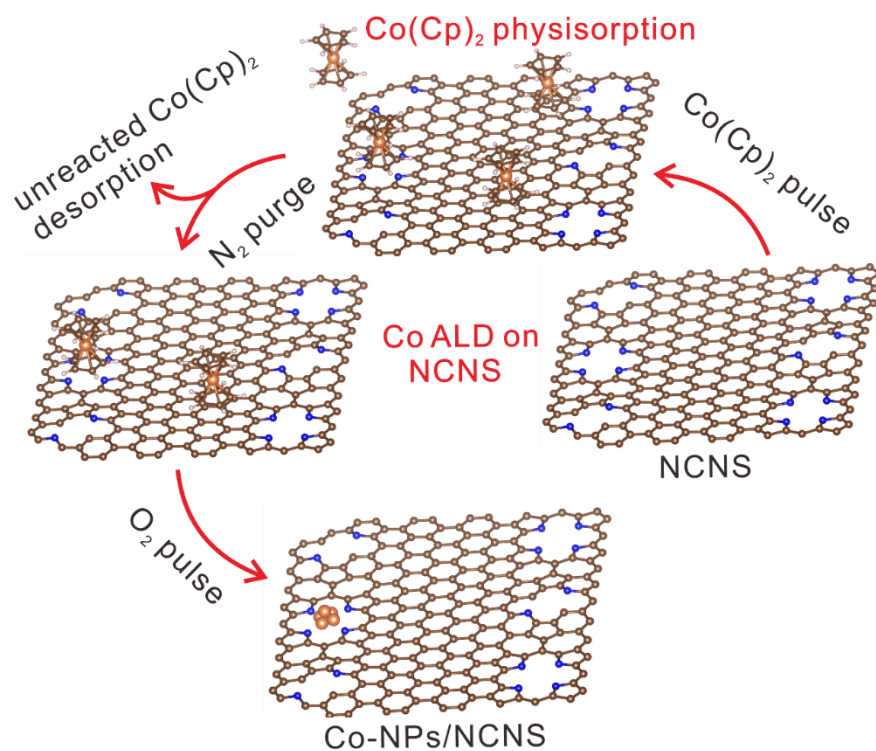

**Supplementary Fig. 5** Illustration of Co ALD process on NCNS. The white, blue, brown, and orange spheres represent H, N, C, and Co, respectively.

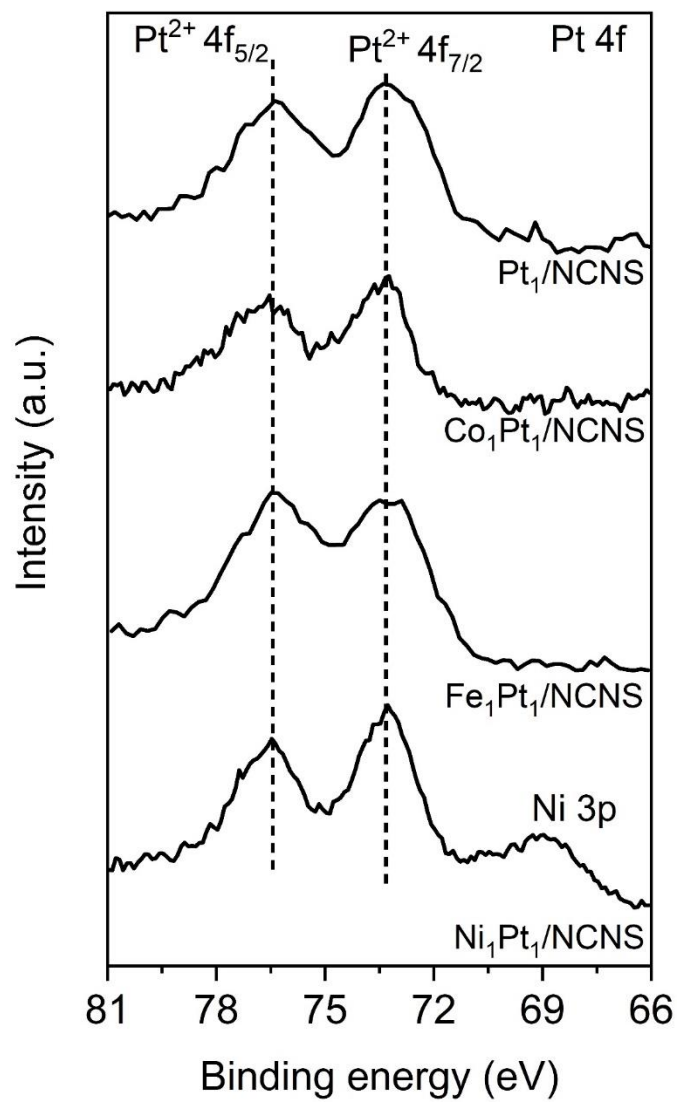

**Supplementary Fig. 6** XPS results of Pt<sub>1</sub>/NCNS, Co<sub>1</sub>Pt<sub>1</sub>/NCNS, Fe<sub>1</sub>Pt<sub>1</sub>/NCNS, and Ni<sub>1</sub>Pt<sub>1</sub>/NCNS at Pt 4f region.

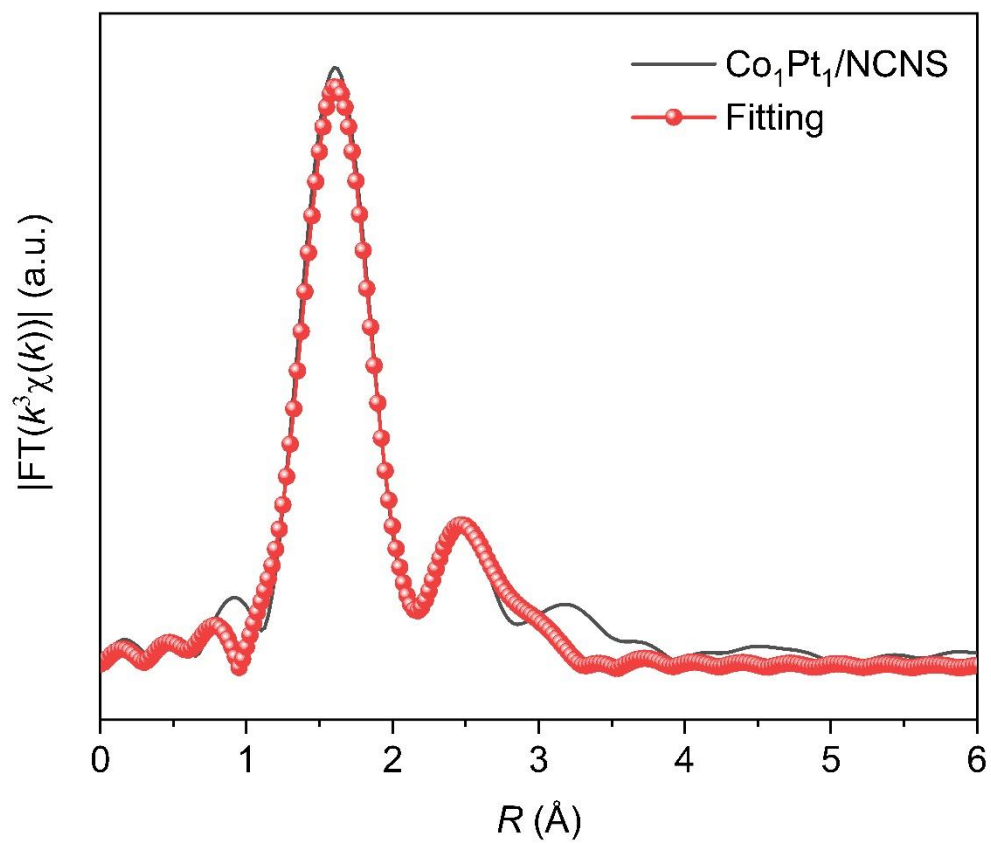

**Supplementary Fig. 7**  $k^3$ -weighted FT spectrum in R space fitting for  $\text{Co}_1\text{Pt}_1/\text{NCNS}$  at Pt  $L_3$  edge.



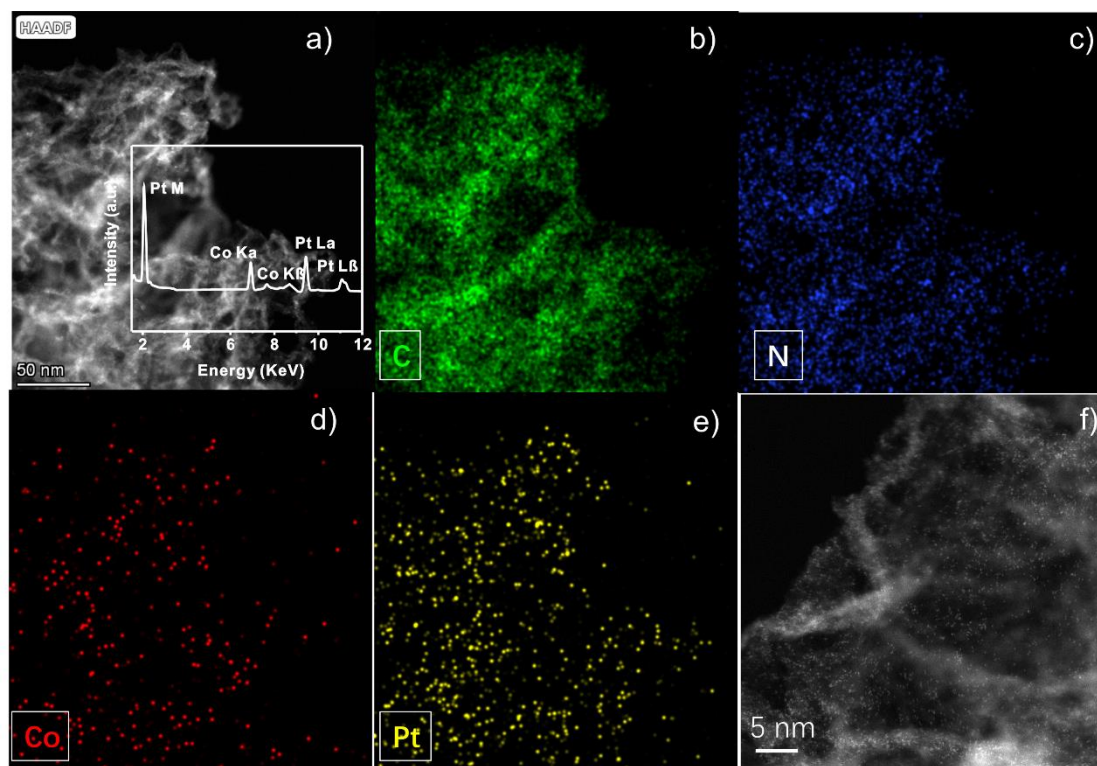

**Supplementary Fig. 8** (a) STEM image and EDX elemental analysis. (b to e) EDX mapping. (f) high magnification HAADF-STEM image of Co<sub>1</sub>Pt<sub>1</sub>/NCNS.

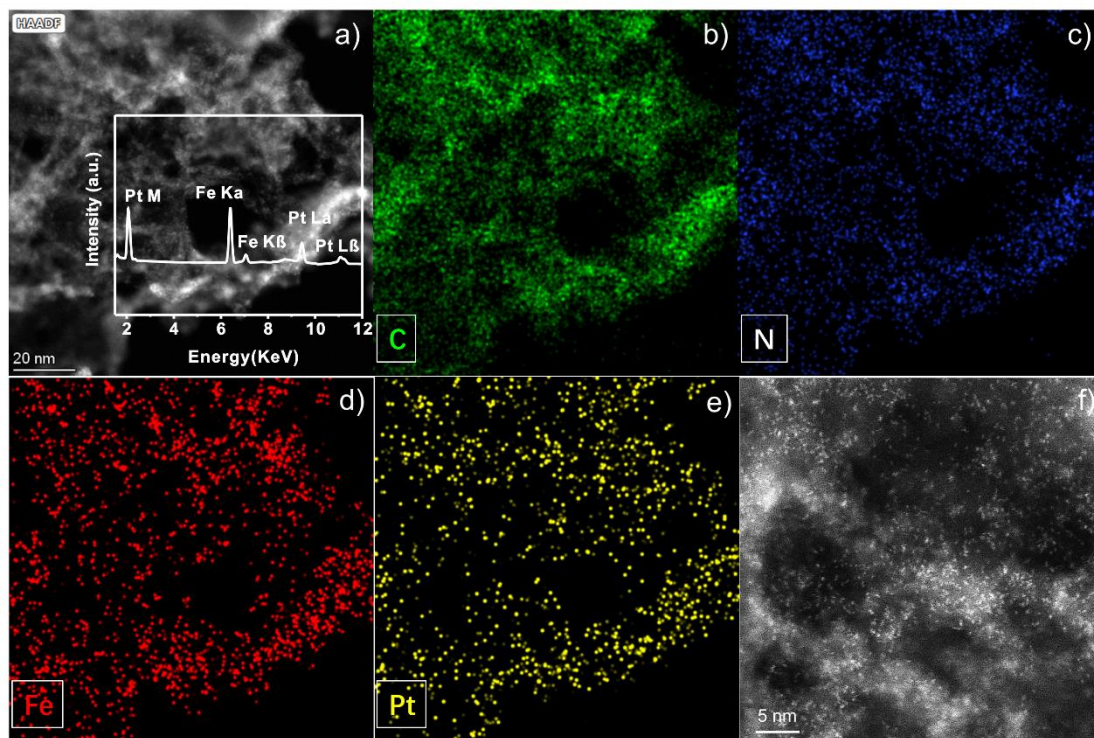

**Supplementary Fig. 9** (a) STEM image and EDX elemental analysis. (b to e) EDX mapping. (f) high magnification HAADF-STEM image of Fe<sub>1</sub>Pt<sub>1</sub>/NCNS.

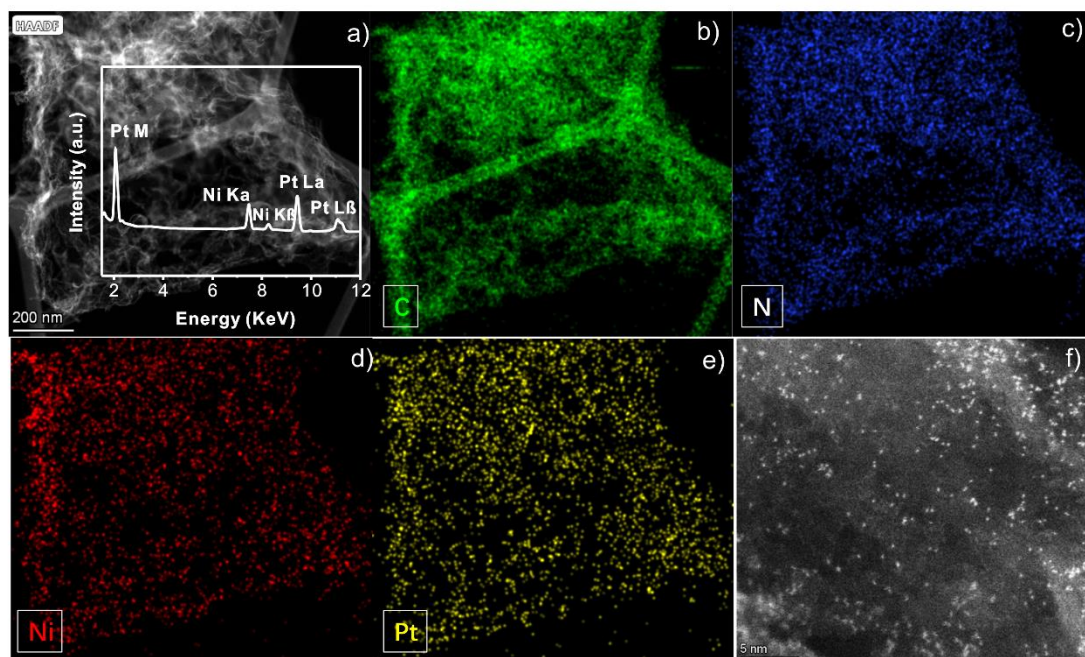

**Supplementary Fig. 10** (a) STEM image and EDX elemental analysis. (b to e) EDX mapping. (f) high magnification HAADF-STEM image of Ni<sub>1</sub>Pt<sub>1</sub>/NCNS.

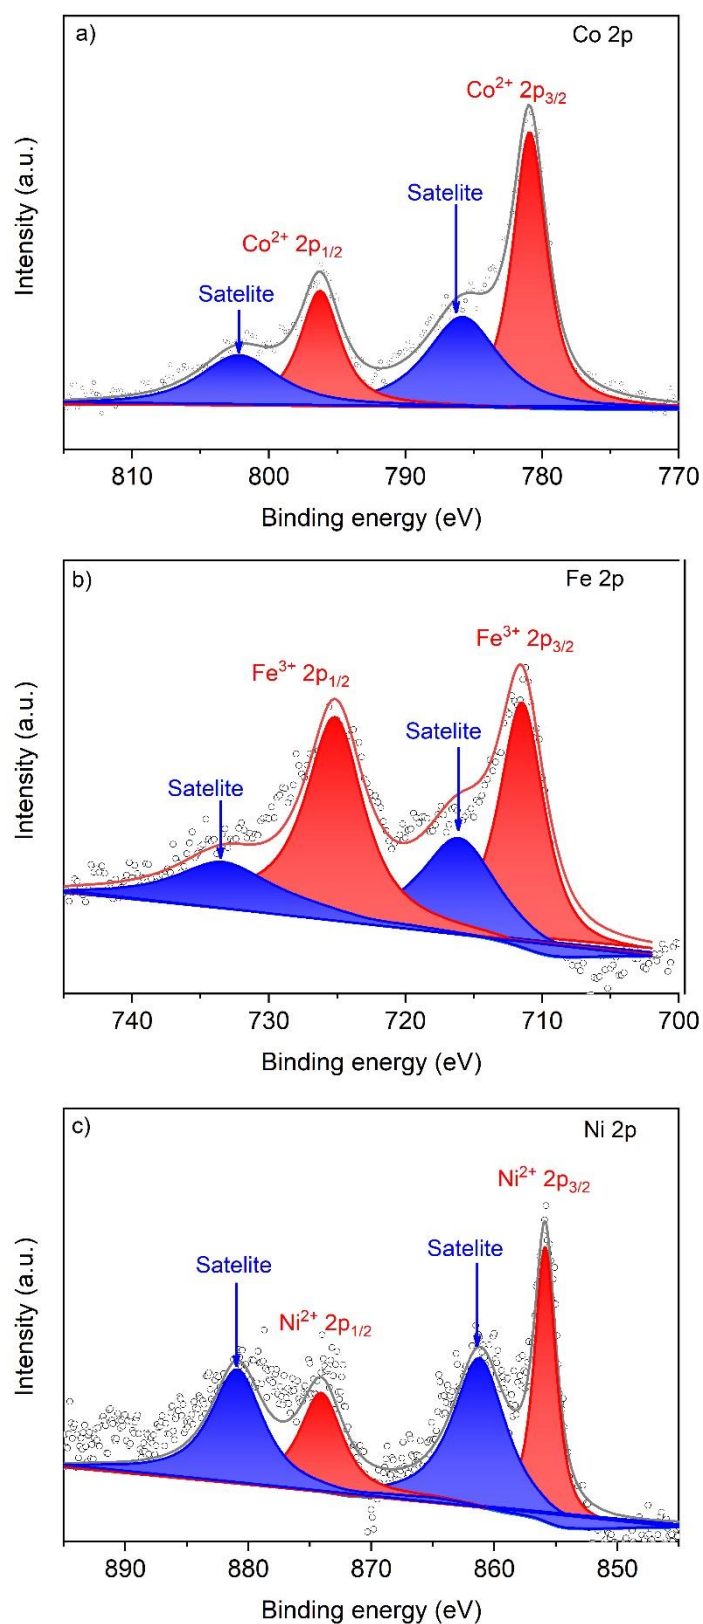

**Supplementary Fig. 11** XPS results of  $\text{Co}_1\text{Pt}_1/\text{NCNS}$  at Co 2p region (a),  $\text{Fe}_1\text{Pt}_1/\text{NCNS}$  at Fe 2p region (b), and  $\text{Ni}_1\text{Pt}_1/\text{NCNS}$  at Ni 2p region (c).

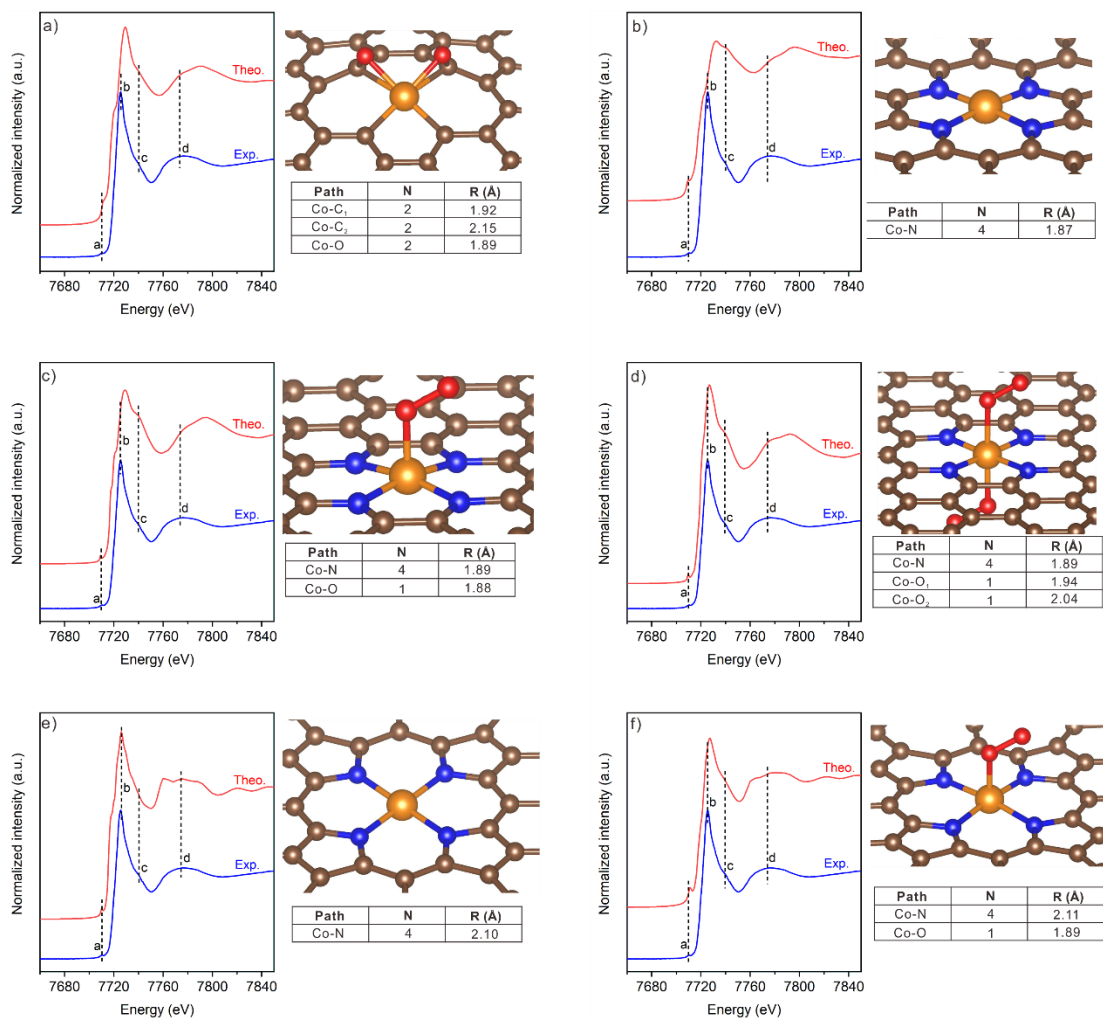

**Supplementary Fig. 12** (a to f) Comparison between the experimental Co *K*-edge XANES spectrum of Co<sub>1</sub>Pt<sub>1</sub>/NCNS and computational spectra based on the optimized structures. The white, blue, brown, red, and orange spheres represent H, N, C, O, and Co, respectively.



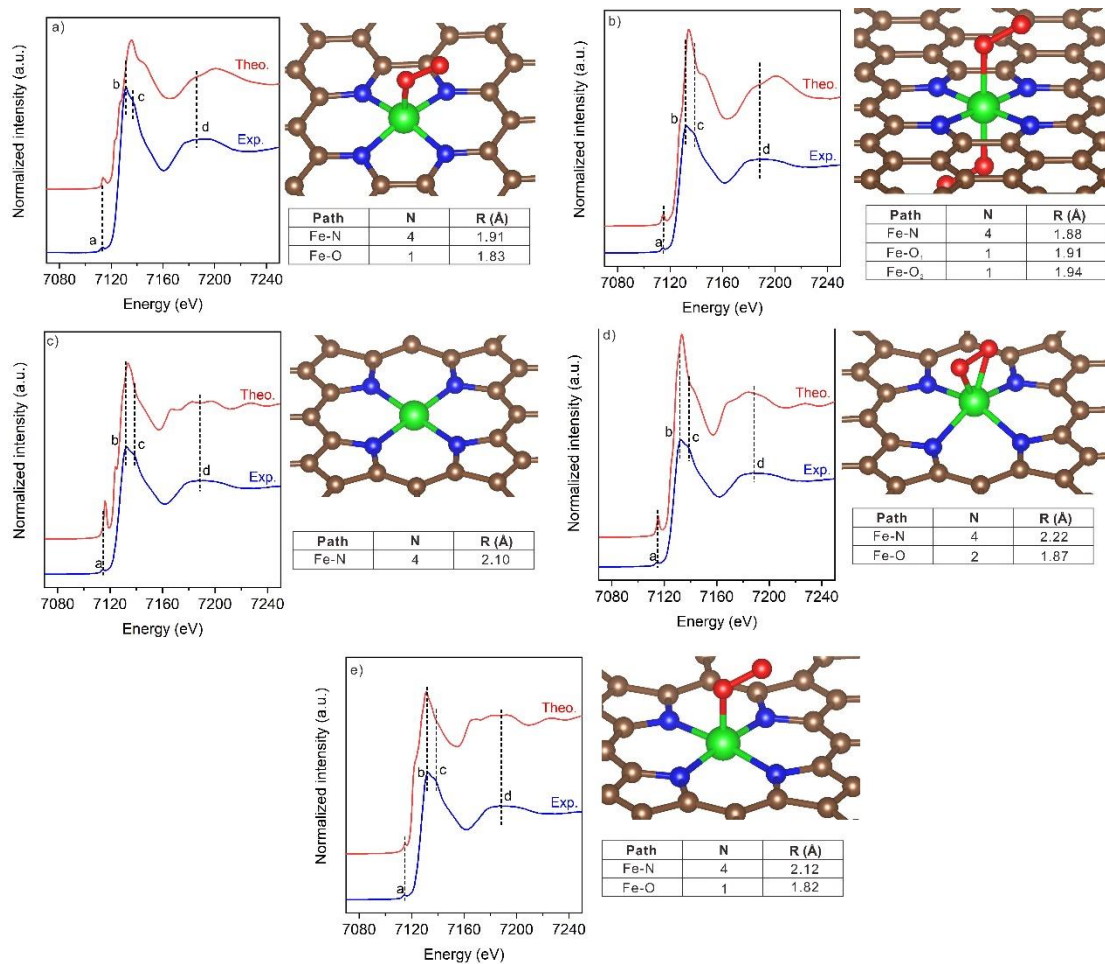

**Supplementary Fig. 13** (a to e) Comparison between the experimental Fe *K*-edge XANES spectrum of Fe<sub>1</sub>Pt<sub>1</sub>/NCNS and computational spectra based on the optimized structures. The white, blue, brown, red, and green spheres represent H, N, C, O, and Fe, respectively.

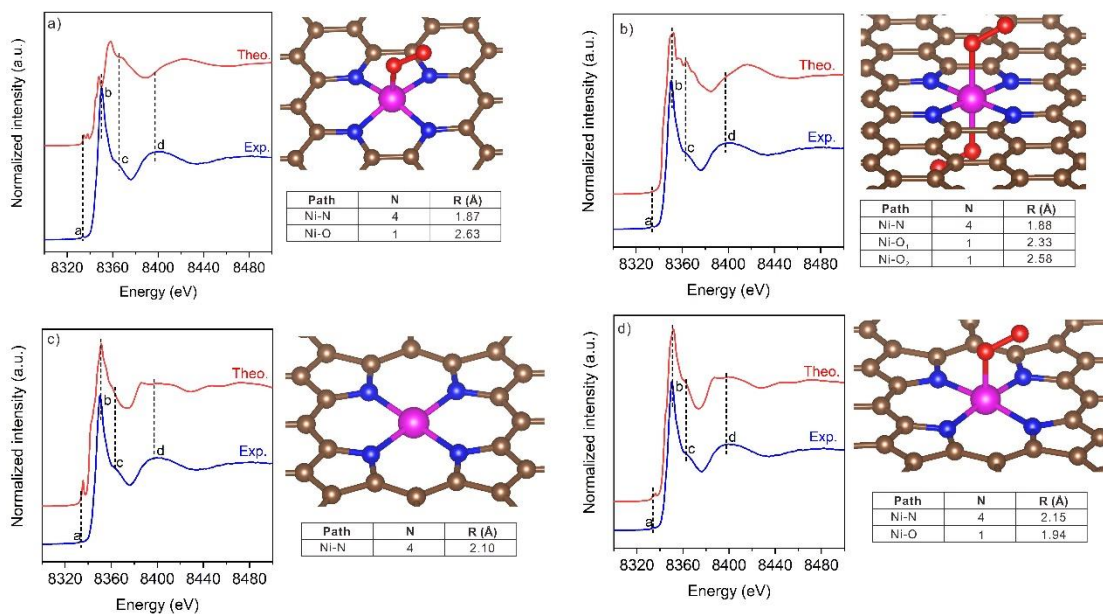

**Supplementary Fig. 14** (a to d) Comparison between the experimental Ni *K*-edge XANES spectrum of Ni<sub>1</sub>Pt<sub>1</sub>/NCNS and computational spectra based on the optimized structures. The white, blue, brown, red, and pink spheres represent H, N, C, O, and Ni, respectively.

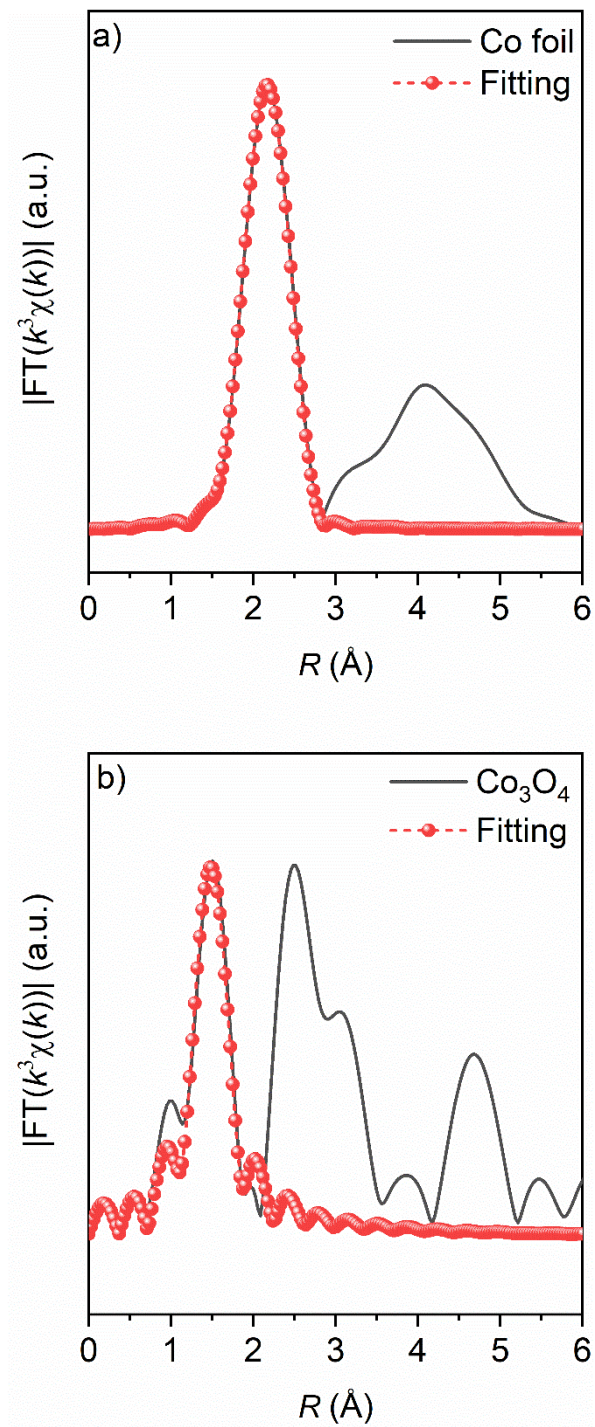

**Supplementary Fig. 15**  $k^3$ -weighted FT spectrum in R space fitting for Co foil (a) and  $\text{Co}_3\text{O}_4$  (b) at Co *K* edge.



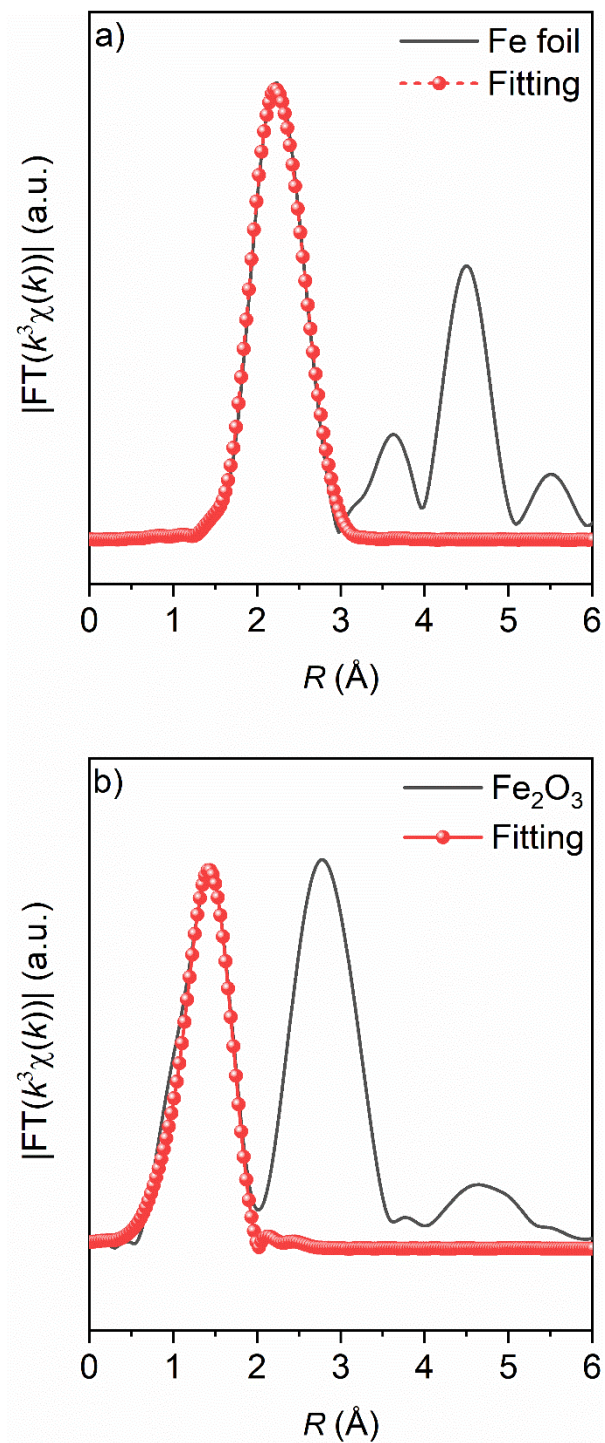

**Supplementary Fig. 16**  $k^3$ -weighted FT spectrum in R space fitting for Fe foil (a) and  $\text{Fe}_2\text{O}_3$  (b) at Fe *K* edge.

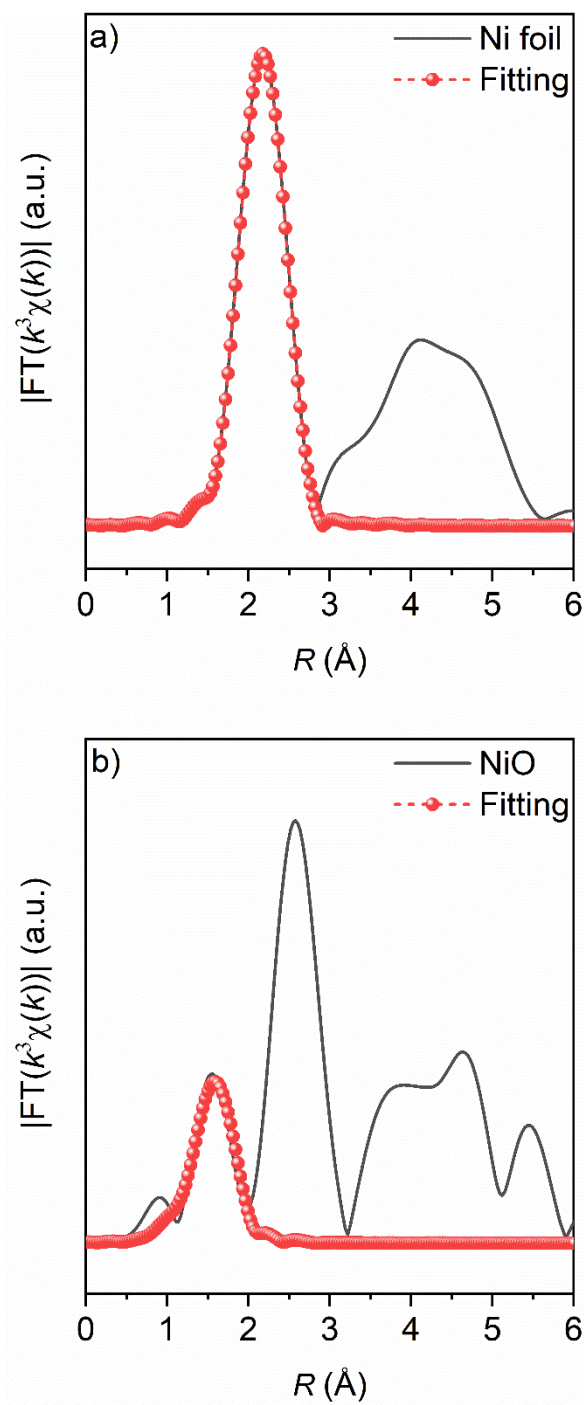

**Supplementary Fig. 17**  $k^3$ -weighted FT spectrum in R space fitting for Ni foil (a) and NiO (b) at Ni *K* edge.

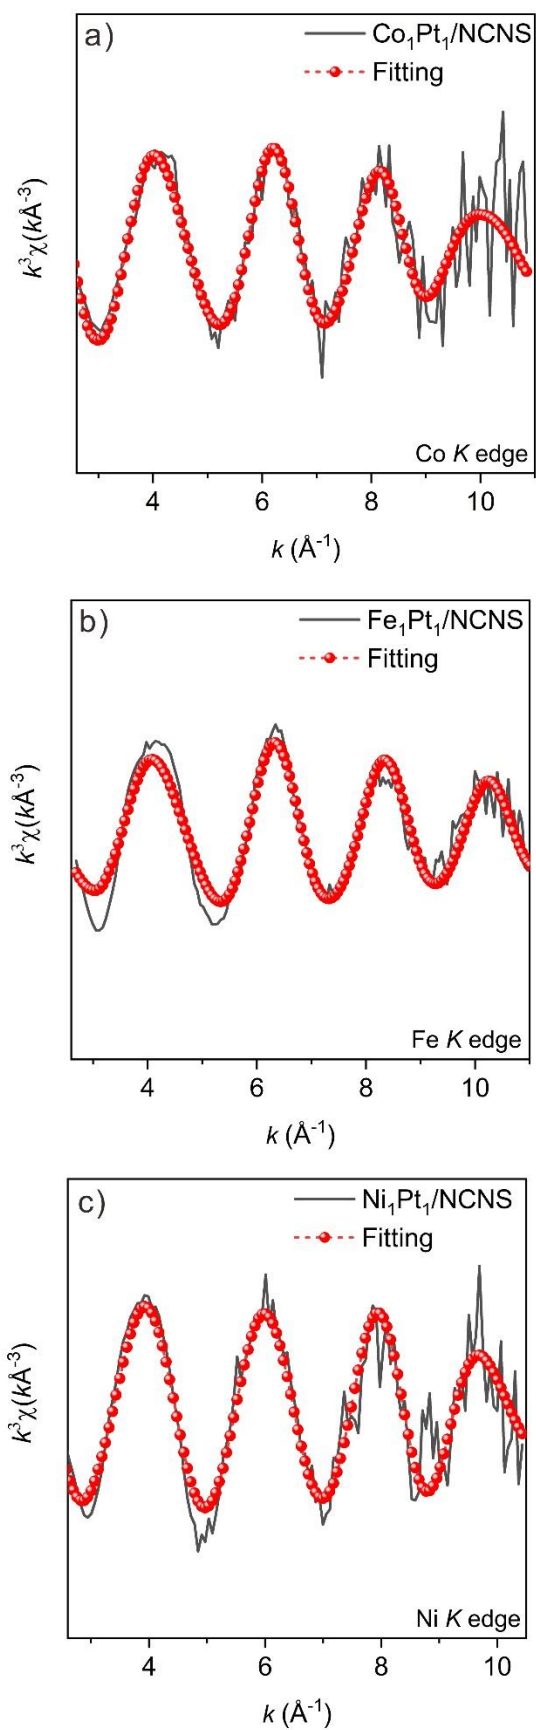

**Supplementary Fig. 18**  $k^3$ -weighted FT spectrum in  $k$  space fitting for  $\text{M}_1\text{Pt}_1/\text{NCNS}$  at Co (a), Fe (b), and Ni (c) K edges.

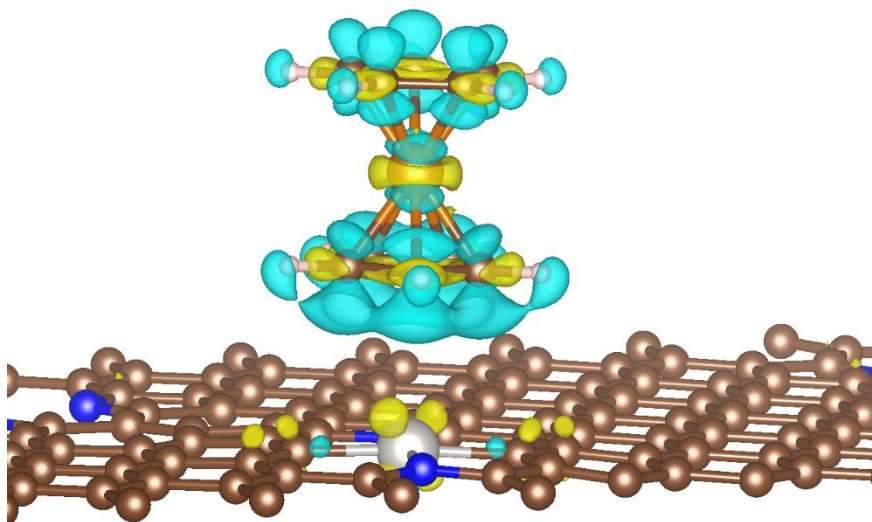

**Supplementary Fig. 19** Calculated charge density difference for  $\text{Co}(\text{Cp})_2$  adsorption on the  $\text{Pt}_1/\text{NCNS}$ . Yellow and cyan iso-surface represent electron accumulation and electron depletion, respectively. The white, blue, brown, orange, and silver spheres represent H, N, C, Co, and Pt, respectively.

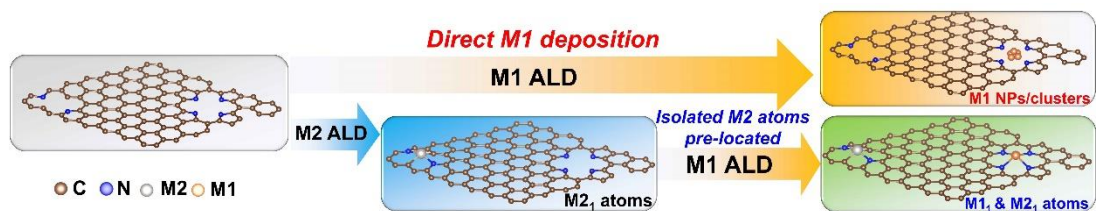

**Supplementary Fig. 20** Illustration of the synthesis process to achieve SACs using pre-located isolated atoms.

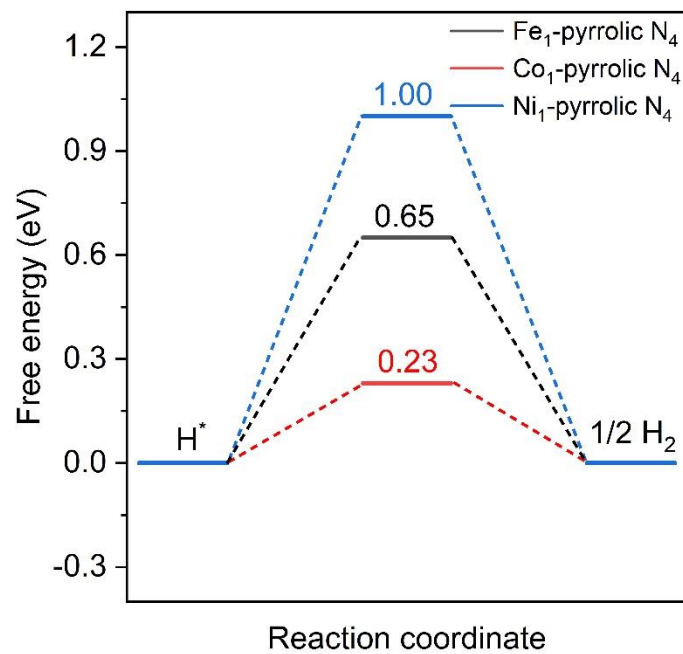

**Supplementary Fig. 21** Calculated Gibbs free energy profiles of HER at the equilibrium potential on M<sub>1</sub>-pyrrolic N<sub>4</sub> sites at T = 298.15 K and P = 1 atm.



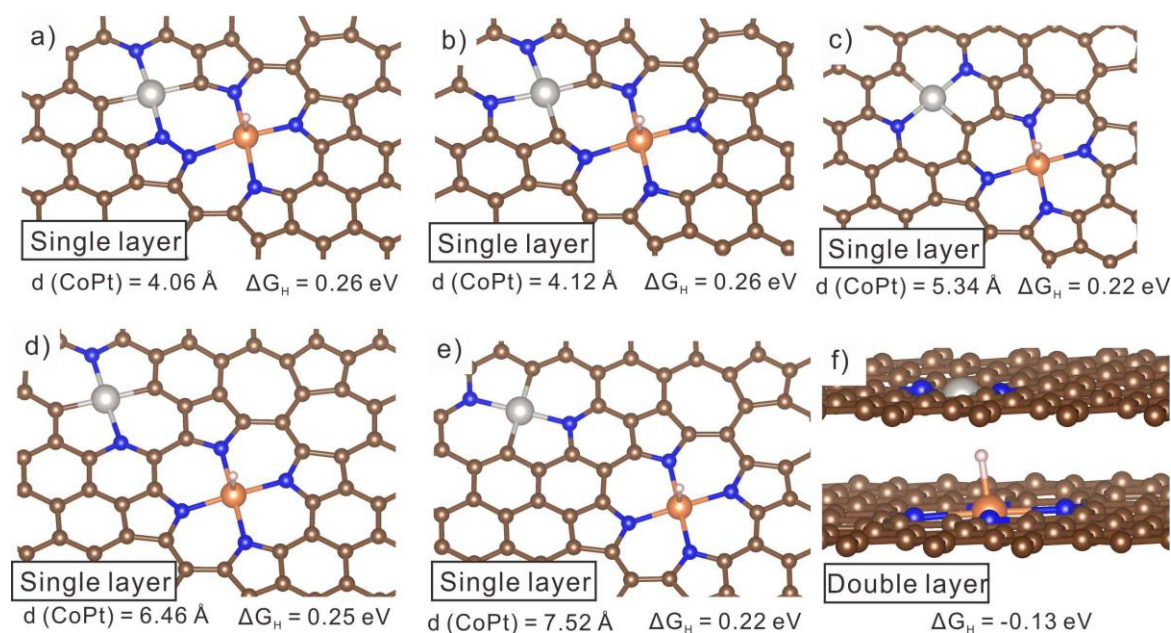

**Supplementary Fig. 22** DFT optimized structures and calculated Gibbs free energy profiles of HER at the equilibrium potential of single-layered (a to e) and double-layered (f) Co<sub>1</sub>Pt<sub>1</sub>/NCNS at T = 298.15 K and P = 1 atm.

**Note:**

As the Co<sub>1</sub>Pt<sub>1</sub>/NCNS exhibits the best catalytic activity, we have taken it as a typical example for the further theoretical understanding of the interaction of Co<sub>1</sub> and Pt<sub>1</sub> in the HER.

- 1) Considering the Co<sub>1</sub>Pt<sub>1</sub>/NCNS is in a single-layered structure, we have adjusted the distances between Co<sub>1</sub> and Pt<sub>1</sub> single atoms to investigate the different catalytic activity of Co<sub>1</sub> single atoms in HER (**Supplementary Figs. 22a to e**). However, the hydrogen adsorption free energies ( $\Delta G_H$ ) at T = 298.15K and P = 1atm are almost the same, despite different distances between Co<sub>1</sub> and Pt<sub>1</sub> single atoms, indicating the interaction of Pt<sub>1</sub> and Co<sub>1</sub> atoms is less pronounced in the single-layered structure.
- 2) According to the literature, the interaction between two single atoms in the double-layered structure could promote catalytic performance<sup>4,5</sup>. We further consider the bilayer structure in our system and found the interactions between Co<sub>1</sub> and Pt<sub>1</sub> in each layer are strongly enhanced, with the bond distance of Co-Pt decreased to 2.91 Å. The  $\Delta G_H$  of Co<sub>1</sub> is -0.13 eV on the double-layered model, which is much lower than that in the single-layer structure (0.23 eV) (**Supplementary Fig. 22f**).

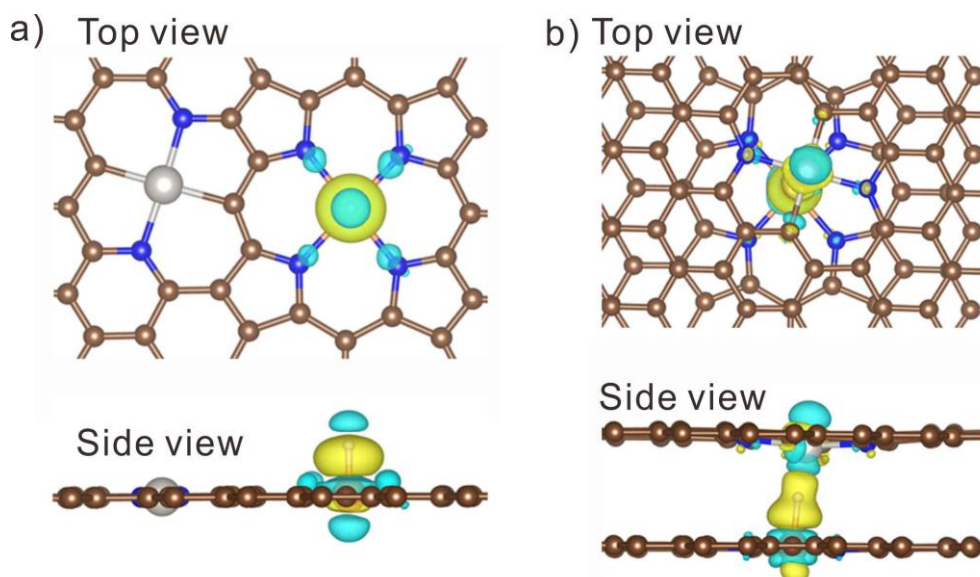

**Supplementary Fig. 23** Top and side view of the calculated charge distribution of single (a) and double (b)-layered  $\text{Co}_1\text{Pt}_1/\text{NCNS}$ . Yellow and cyan iso-surface represent electron accumulation and electron depletion, respectively. The white, blue, brown, orange, and silver spheres represent H, N, C, Co, and Pt, respectively.

Note:

We have compared the charge distributions of single/double layered  $\text{Co}_1\text{Pt}_1/\text{NCNS}$  (**Supplementary Figs. 23a and b**). As shown in **Supplementary Fig. 23**, the charge polarization on double-layered  $\text{Co}_1\text{Pt}_1/\text{NCNS}$  shows obvious differences between single and double-layered models. Differing from the single-layered structure, the electron accumulation is strongly enhanced by the interlayer on the double-layered  $\text{Co}_1\text{Pt}_1/\text{NCNS}$ <sup>6</sup>. As a result, the adsorption of protons is facilitated (**Supplementary Fig. 22f**). Therefore, the  $\text{Co}_1\text{Pt}_1/\text{NCNS}$  shows better performance than the  $\text{Pt}_1/\text{NCNS}$  in HER could be likely due to the extra contribution of  $\text{Co}_1$  pyrrolic- $\text{N}_4$  sites in both single/double-layered structures.



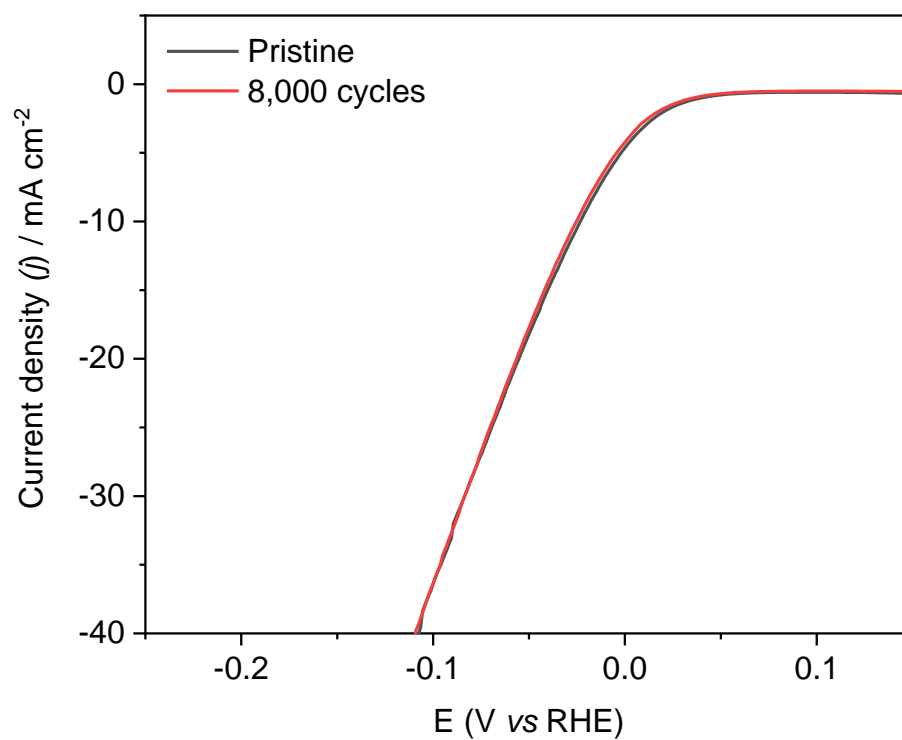

**Supplementary Fig. 24** The durability test of Co<sub>1</sub>Pt<sub>1</sub>/NCNS without IR correction at the sweep voltage between -0.1 and 0.4 V at a scan rate of 0.1 V s<sup>-1</sup> in 0.5 M H<sub>2</sub>SO<sub>4</sub>.

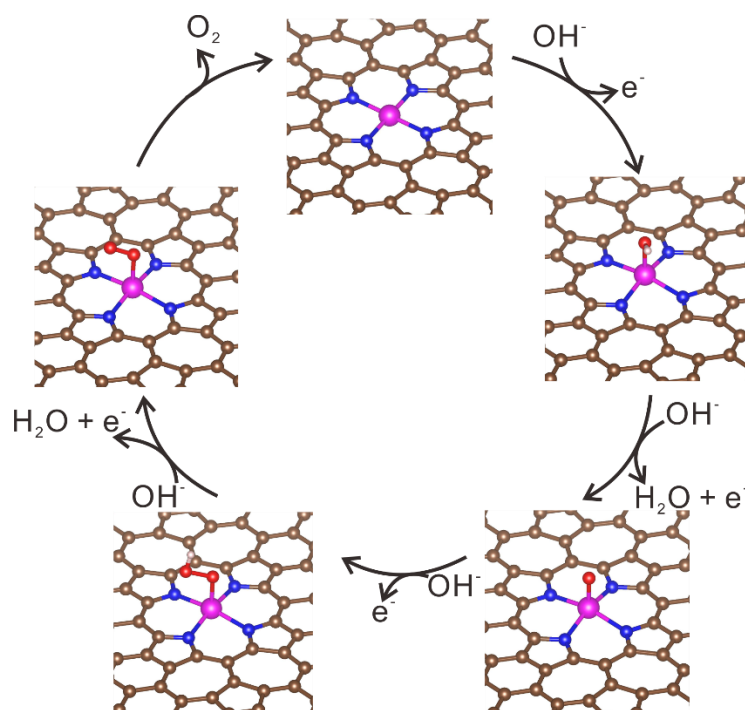

**Supplementary Fig. 25** Computationally proposed reaction scheme for OER at alkaline condition on Ni<sub>1</sub>-pyrrolic N<sub>4</sub> site. The brown, blue, red, and pink spheres represent C, N, O, and Ni, respectively.

**Note:**

The OER occurs at alkaline conditions via the following steps:

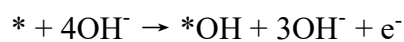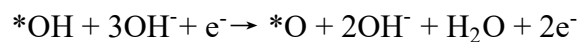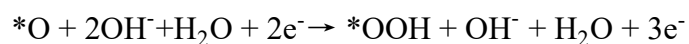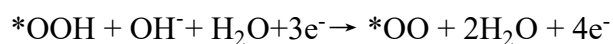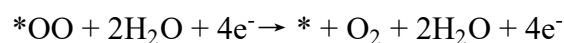

where \* denotes the active site.

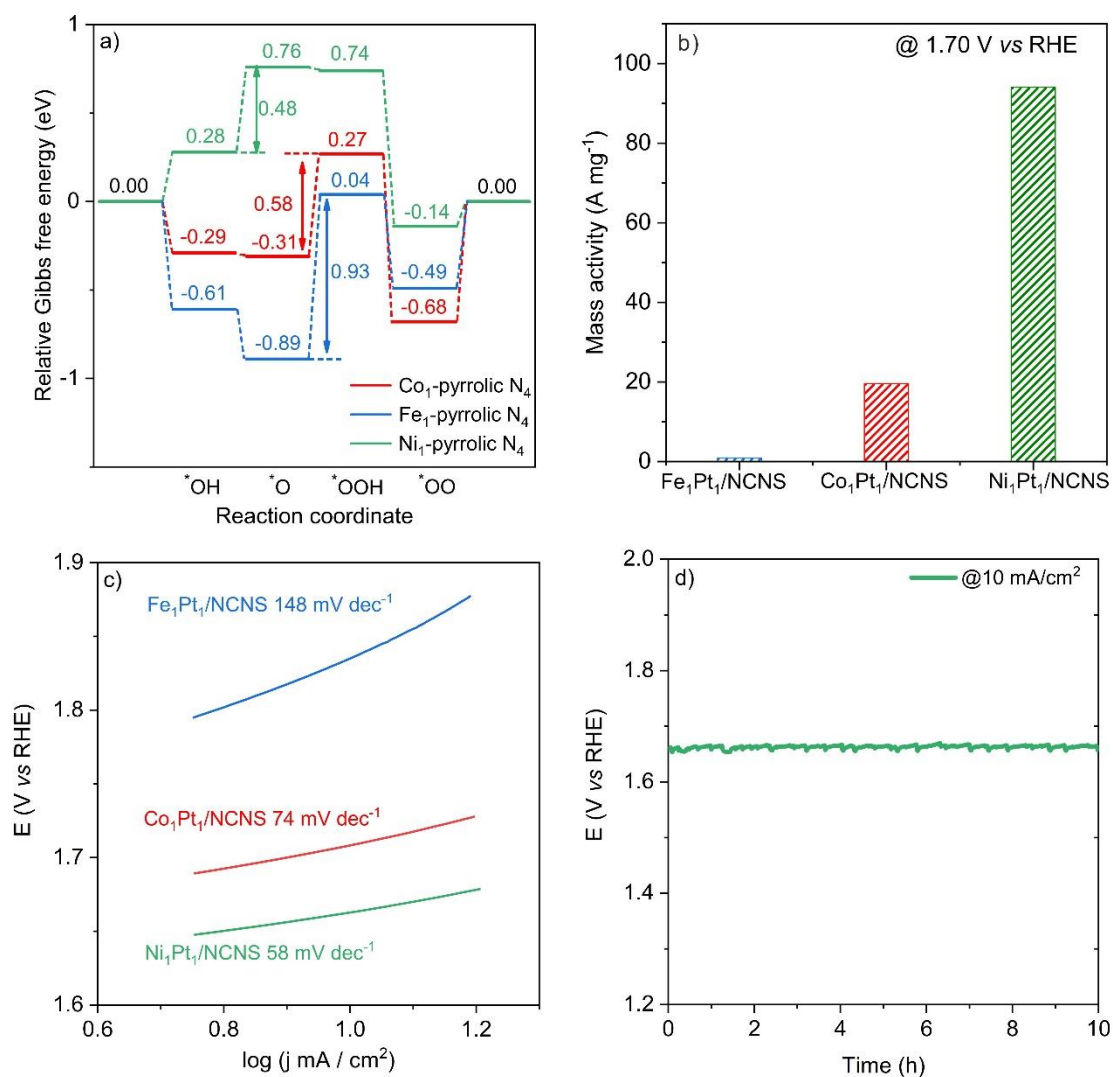

**Supplementary Fig. 26** Theoretically predicted activity of OER and electrochemical performance of  $M_1Pt_1/NCNS$  ( $M = Co, Fe, \text{ and } Ni$ ). (a) Relative Gibbs free energy for  $M_1Pt_1/NCNS$  for OER at 1.23 V at  $T = 298.15\ K$  and  $P = 1\ atm$ . (b) Mass activity of  $Fe_1Pt_1/NCNS$ ,  $Co_1Pt_1/NCNS$  and  $Ni_1Pt_1/NCNS$  at 1.70 V (vs RHE). (c) Tafel plots of  $M_1Pt_1/NCNS$  catalysts. (d) The durability test of  $Ni_1Pt_1/NCNS$  at a constant current density of 10  $mA/cm^2$ .

**Note:**

Although it has been reported in the literature that the pyridinic- $N_4$  type non-noble metal SACs exhibited high catalytic performance in OER, the investigation of pyrrolic- $N_4$  type SACs is rarely studied<sup>7</sup>. Note that the axial  $O_2$  molecules are not considered in the theoretical calculation because of the  $O_2$  evolution process. According to the literature, the  $d$ -band center near the Fermi level is linked with the adsorption of reactants<sup>8</sup>. As shown in **Fig. 6a** and **Supplementary Table 4**, the  $d$ -band center of

metal atom in  $M_1Pt_1/NCNS$  increases from Ni to Fe, indicating there would be much stronger adsorption of oxygen species on  $Fe_1$  atom than that on  $Ni_1$  and  $Co_1$  atoms. Based on previous work<sup>9</sup>, we theoretically investigated the OER mechanism on  $M_1$ -pyrrolic  $N_4$  ( $M = Co, Fe, \text{ and } Ni$ ) catalysts by considering the adsorption of  $*OH$ ,  $*O$ ,  $*OOH$ , and  $*OO$  intermediates (**Supplementary Fig. 25**), with the Gibbs free energy diagram calculated at  $T = 298.15K$  and  $P = 1atm$  shown in **Supplementary Fig. 26a**. It is found that the rate-determining step (RDS) is the oxidation of  $*OH^*$  to  $*O$  with an energy barrier of 0.48 eV for  $Ni_1Pt_1/NCNS$ . However, the formation of  $*OOH$  becomes the RDS for  $Co_1Pt_1/NCNS$  and  $Fe_1Pt_1/NCNS$ , which possesses a higher energy barrier of 0.58 and 0.93 eV, respectively. Thus, we can predict that the OER activity on these three SACs would follow the order of  $Ni_1Pt_1/NCNS > Co_1Pt_1/NCNS > Fe_1Pt_1/NCNS$ .

The mass activity of  $Fe_1$ ,  $Co_1$ ,  $Ni_1Pt_1/NCNS$  at 1.70 V (vs RHE) is based on the loading of Fe, Co, and Ni (**Supplementary Fig. 26b**). The  $Ni_1Pt_1/NCNS$  exhibits the highest mass activity of 94.1 A/mg<sub>Ni</sub>, which is more than four times higher than that of  $Co_1Pt_1/NCNS$  (19.6 A/mg<sub>Co</sub>). The Tafel plots further demonstrate the kinetic advantage of  $Ni_1Pt_1/NCNS$ , with a lower Tafel slope (58 mV/dec) than  $Co_1Pt_1/NCNS$  (74 mV/dec) and  $Fe_1Pt_1/NCNS$  (148 mV/dec) (**Supplementary Fig. 26c**). More importantly, the  $Ni_1Pt_1/NCNS$  exhibits significant stability, without showing an obvious activity decrease after 10 h at a current density of 10 mA/cm<sup>2</sup> in durability testing (**Supplementary Fig. 26d**).

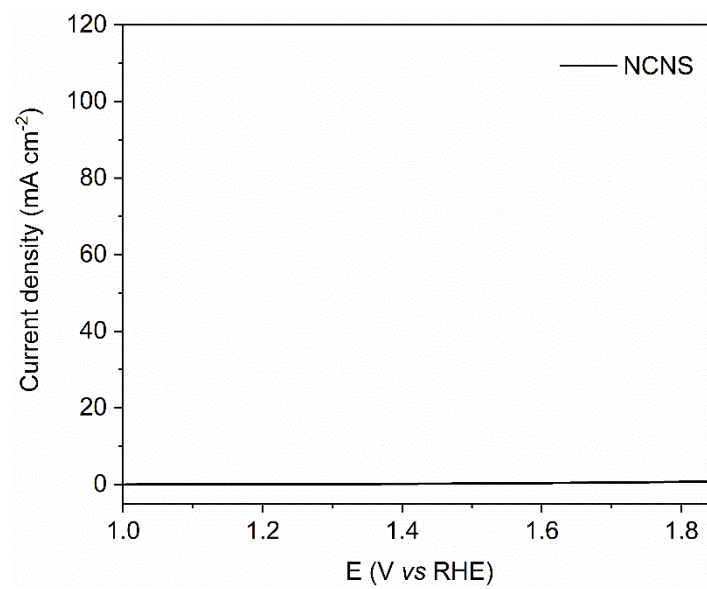

**Supplementary Fig. 27** OER LSV curves NCNS under 1 M KOH at a scan rate of 5 mV/s.

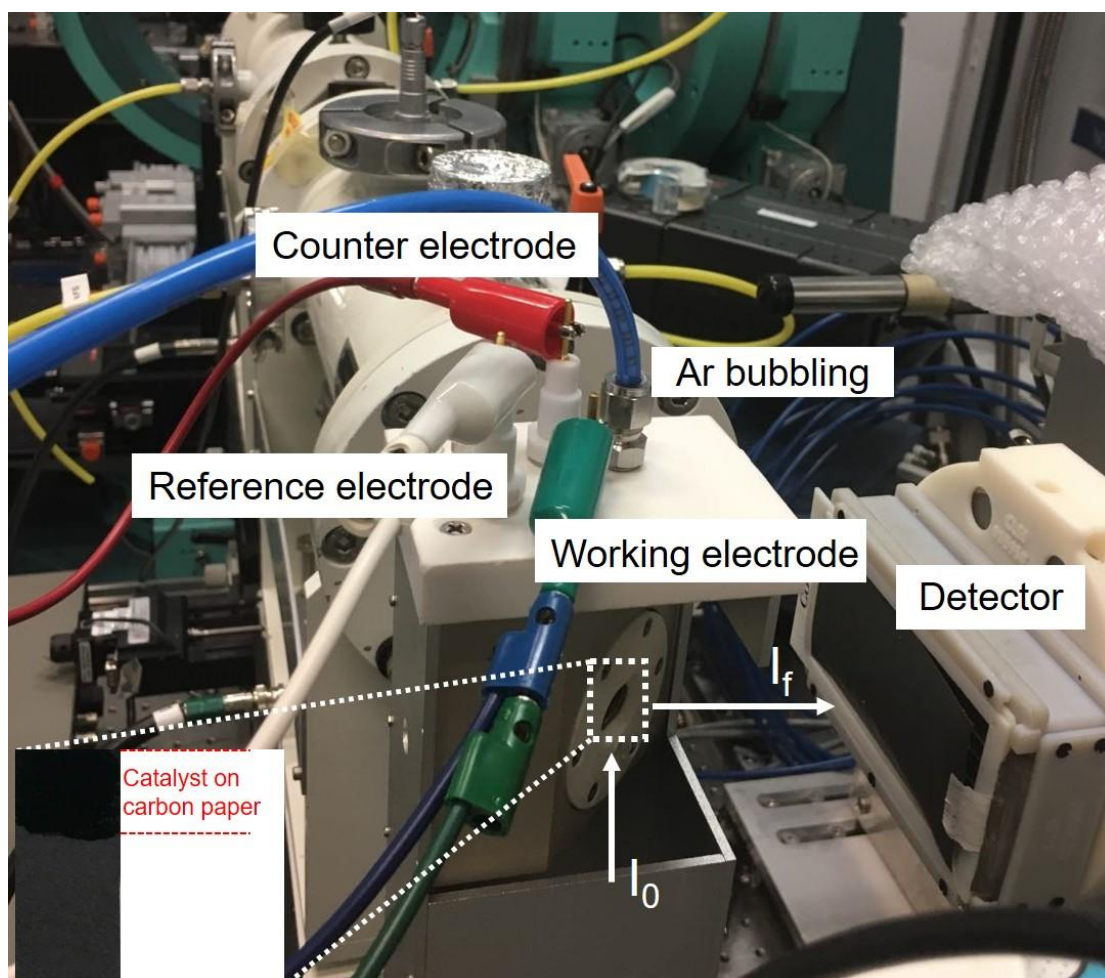

**Supplementary Fig. 28** Illustration of the electrochemical cell used for *operando* XAS measurements.

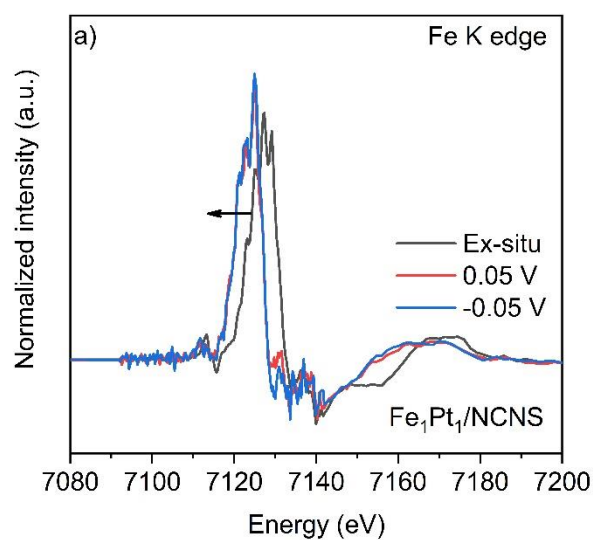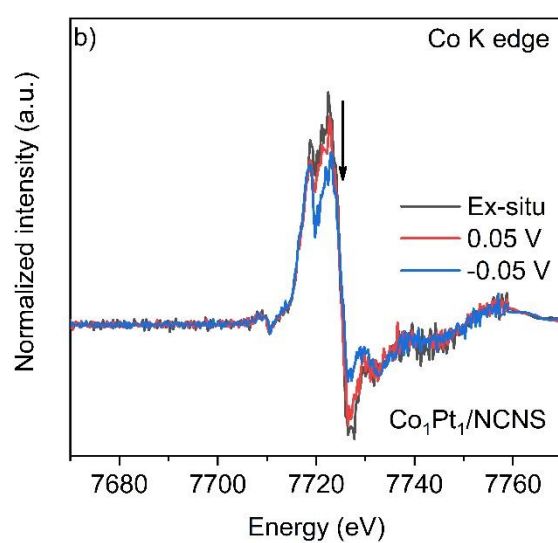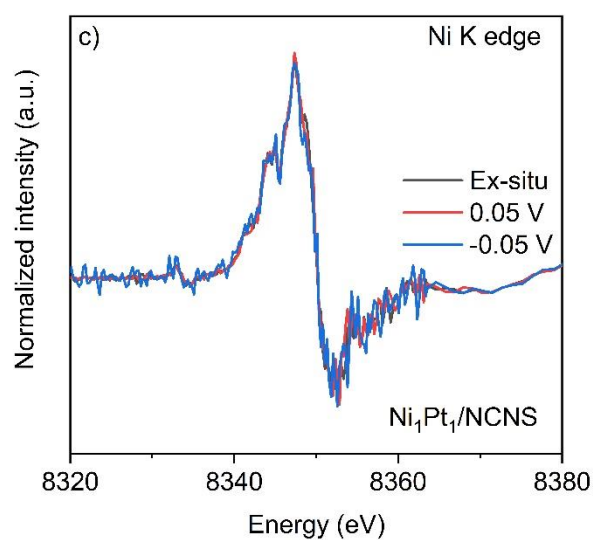

**Supplementary Fig. 29** Derivative *operando* XANES spectra at the Fe (a) , Co (b) and Ni (c) K edges for  $\text{Fe}_1\text{Pt}_1/\text{NCNS}$ ,  $\text{Co}_1\text{Pt}_1/\text{NCNS}$ , and  $\text{Ni}_1\text{Pt}_1/\text{NCNS}$ , respectively.

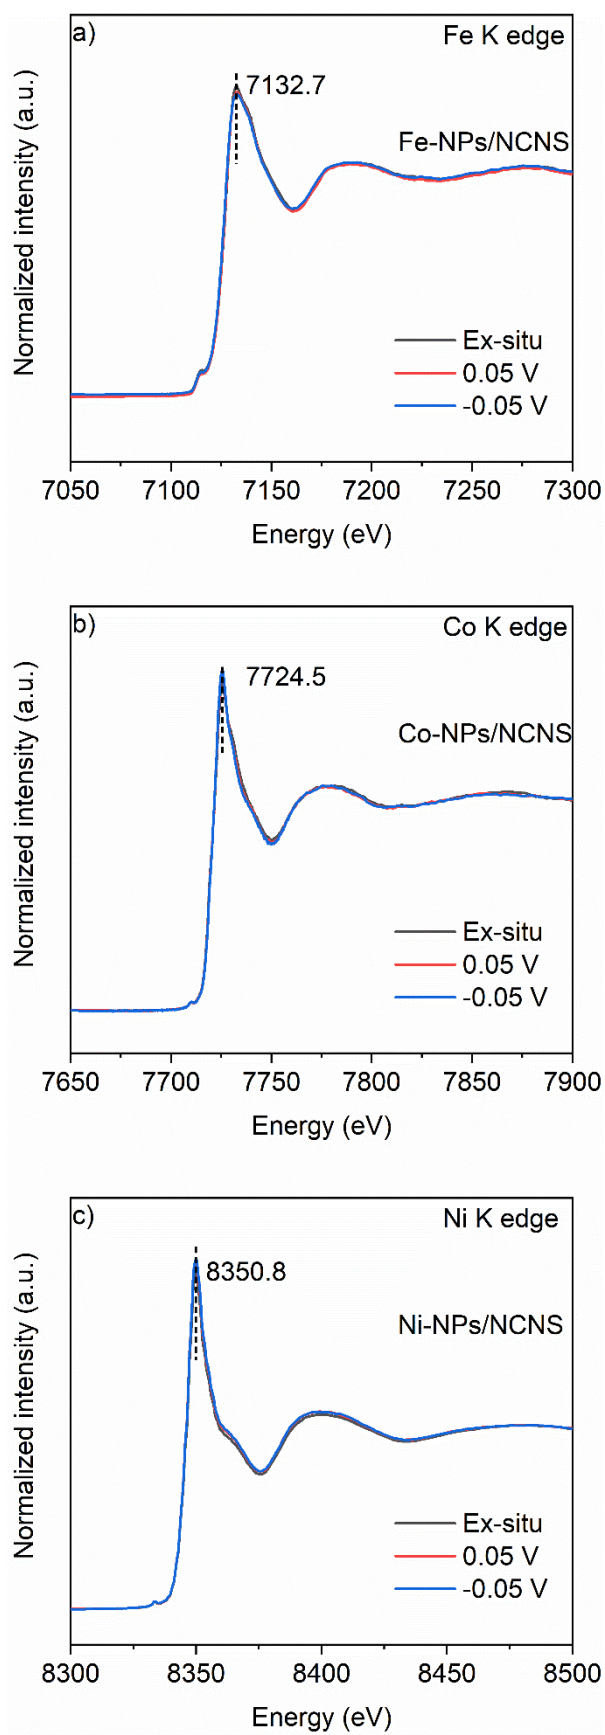

**Supplementary Fig. 30** Operando XANES on Fe (a), Co (b), and Ni (c) -NPs/NCNS under HER condition at Fe, Co, and Ni *K* edges, respectively.



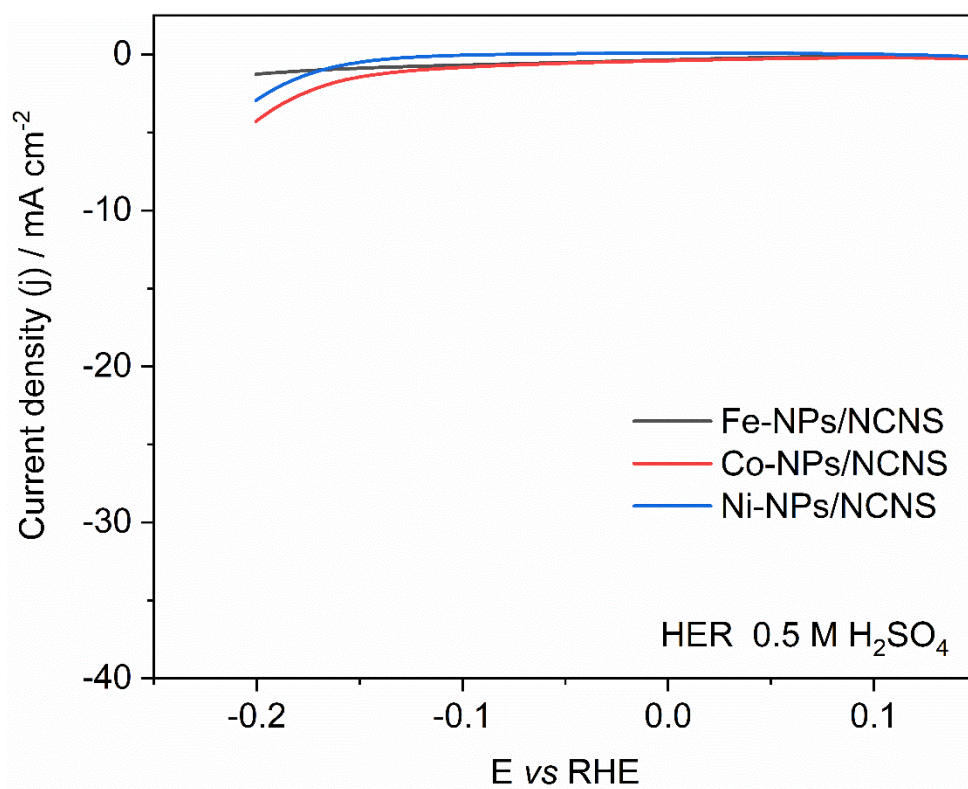

**Supplementary Fig. 31** Electrocatalytic performance of Fe, Co, and Ni-NPs/NCNS in HER.

**Supplementary Table 1.** Structural parameters of the Co<sub>1</sub>Pt<sub>1</sub>/NCNS, Pt foil, and PtO<sub>2</sub> references extracted from quantitative EXAFS curve-fittings.

| Sample                                | Path  | CNs  | <i>R</i> (Å) | $\sigma^2$<br>(10 <sup>-3</sup> Å <sup>2</sup> ) | $\Delta E_0$<br>(eV) |
|---------------------------------------|-------|------|--------------|--------------------------------------------------|----------------------|
| Pt foil                               | Pt-Pt | 12.0 | 2.76         | 6.0                                              | 7.7                  |
| PtO <sub>2</sub>                      | Pt-O  | 6.0  | 2.02         | 3.0                                              | 1.0                  |
| Co <sub>1</sub> Pt <sub>1</sub> /NCNS | Pt-C  | 2.1  | 1.98         | 1.3                                              | 4.8                  |
|                                       | Pt-N  | 2.1  | 2.05         | 1.7                                              |                      |
|                                       | Pt-C  | 3.8  | 2.89         | 8.0                                              |                      |
|                                       | Pt-C  | 4.0  | 3.21         | 9.5                                              |                      |

CNs, coordination numbers; *R*, bonding distance;  $\sigma^2$ , Debye-Waller factor;  $\Delta E_0$ , inner potential shift. Errors in the fitting parameters are CN  $\pm$  20%, *R*  $\pm$  0.02,  $\sigma^2$   $\pm$  20%, and  $\Delta E_0$   $\pm$  3.0.

**Supplementary Table 2.** The comparison of EXAFS Fitting results and the optimized model of M<sub>1</sub>Pt<sub>1</sub>/NCNS (M = Co, Fe, and Ni).

| Sample                                | EXAFS fitting |              | DFT               |              |
|---------------------------------------|---------------|--------------|-------------------|--------------|
|                                       | Path          | <i>R</i> (Å) | Path              | <i>R</i> (Å) |
| Co <sub>1</sub> Pt <sub>1</sub> /NCNS | Co-O          | 1.98         | Co-O <sub>1</sub> | 1.93         |
|                                       |               |              | Co-O <sub>2</sub> | 1.94         |
|                                       | Co-N          | 2.08         | Co-N              | 2.11         |
| Fe <sub>1</sub> Pt <sub>1</sub> /NCNS | Fe-O          | 1.95         | Fe-O <sub>1</sub> | 1.91         |
|                                       |               |              | Fe-O <sub>2</sub> | 1.92         |
|                                       | Fe-N          | 2.02         | Fe-N              | 2.13         |
| Ni <sub>1</sub> Pt <sub>1</sub> /NCNS | Ni-O          | 1.99         | Ni-O <sub>1</sub> | 1.96         |
|                                       |               |              | Ni-O <sub>2</sub> | 2.00         |
|                                       | Ni-N          | 2.11         | Ni-N              | 2.15         |

**Supplementary Table 3.** Calculated Bader charges of Co and two Cp rings of Co(Cp)<sub>2</sub> in the gas phase and absorption on Pt<sub>1</sub>/NCNS

|                 | <b>In gas</b> | <b>@ Pt<sub>1</sub>/NCNS</b> |
|-----------------|---------------|------------------------------|
| Co              | +0.67         | +0.68                        |
| Cp <sub>1</sub> | -0.34         | +0.10                        |
| Cp <sub>2</sub> | -0.34         | +0.01                        |

**Supplementary Table 4.** Calculated *d*-band centre of metal atoms in M<sub>1</sub>-pyrrolic N<sub>4</sub> catalysts. (unit: eV)

|                                              | <b>Spin up</b> | <b>Spin down</b> | <b>Average</b> |
|----------------------------------------------|----------------|------------------|----------------|
| <b>Fe<sub>1</sub>-pyrrolic N<sub>4</sub></b> | -1.97          | 0.07             | -0.96          |
| <b>Co<sub>1</sub>-pyrrolic N<sub>4</sub></b> | -0.52          | -1.56            | -1.04          |
| <b>Ni<sub>1</sub>-pyrrolic N<sub>4</sub></b> | -1.38          | -1.38            | -1.38          |

## Supplementary References

- 1 Lytle, F. W. Determination of d-band occupancy in pure metals and supported catalysts by measurement of the L<sub>III</sub> X-ray absorption threshold. *J. Catal.* **43**, 376-379 (1976).
- 2 Fang, S. *et al.* Uncovering near-free platinum single-atom dynamics during electrochemical hydrogen evolution reaction. *Nat. Commun.* **11**, 1029 (2020).
- 3 Li, J. *et al.* Unveiling the Nature of Pt Single-Atom Catalyst during Electrocatalytic Hydrogen Evolution and Oxygen Reduction Reactions. *Small* **17**, 2007245 (2021).
- 4 Zhang, L. Z. *et al.* Charge Polarization from Atomic Metals on Adjacent Graphitic Layers for Enhancing the Hydrogen Evolution Reaction. *Angew. Chem. Int. Ed.* **58**, 9404-9408 (2019).
- 5 Zhang, L. Z. *et al.* Coordination of Atomic Co-Pt Coupling Species at Carbon Defects as Active Sites for Oxygen Reduction Reaction. *J. Am. Chem. Soc.* **140**, 10757-10763 (2018).
- 6 Zhuang, L. *et al.* Defect-Induced Pt-Co-Se Coordinated Sites with Highly Asymmetrical Electronic Distribution for Boosting Oxygen-Involving Electrocatalysis. *Adv. Mater.* **31**, 1805581 (2019).
- 7 Fei, H. *et al.* General synthesis and definitive structural identification of MN<sub>4</sub>C<sub>4</sub> single-atom catalysts with tunable electrocatalytic activities. *Nat. Catal.* **1**, 63-72 (2018).
- 8 Montemore, M. M., van Spronsen, M. A., Madix, R. J. & Friend, C. M. O<sub>2</sub> activation by metal surfaces: implications for bonding and reactivity on heterogeneous catalysts. *Chem. Rev.* **118**, 2816-2862 (2017).
- 9 Liao, P., Keith, J. A. & Carter, E. A. Water oxidation on pure and doped hematite (0001) surfaces: Prediction of Co and Ni as effective dopants for electrocatalysis. *J. Am. Chem. Soc.* **134**, 13296-13309 (2012).
